# Supplementary material
Source: MDPI journal article supplement (https://www.mdpi.com/1999-4907/13/11/1831)
Supplement: s1 [file s1]

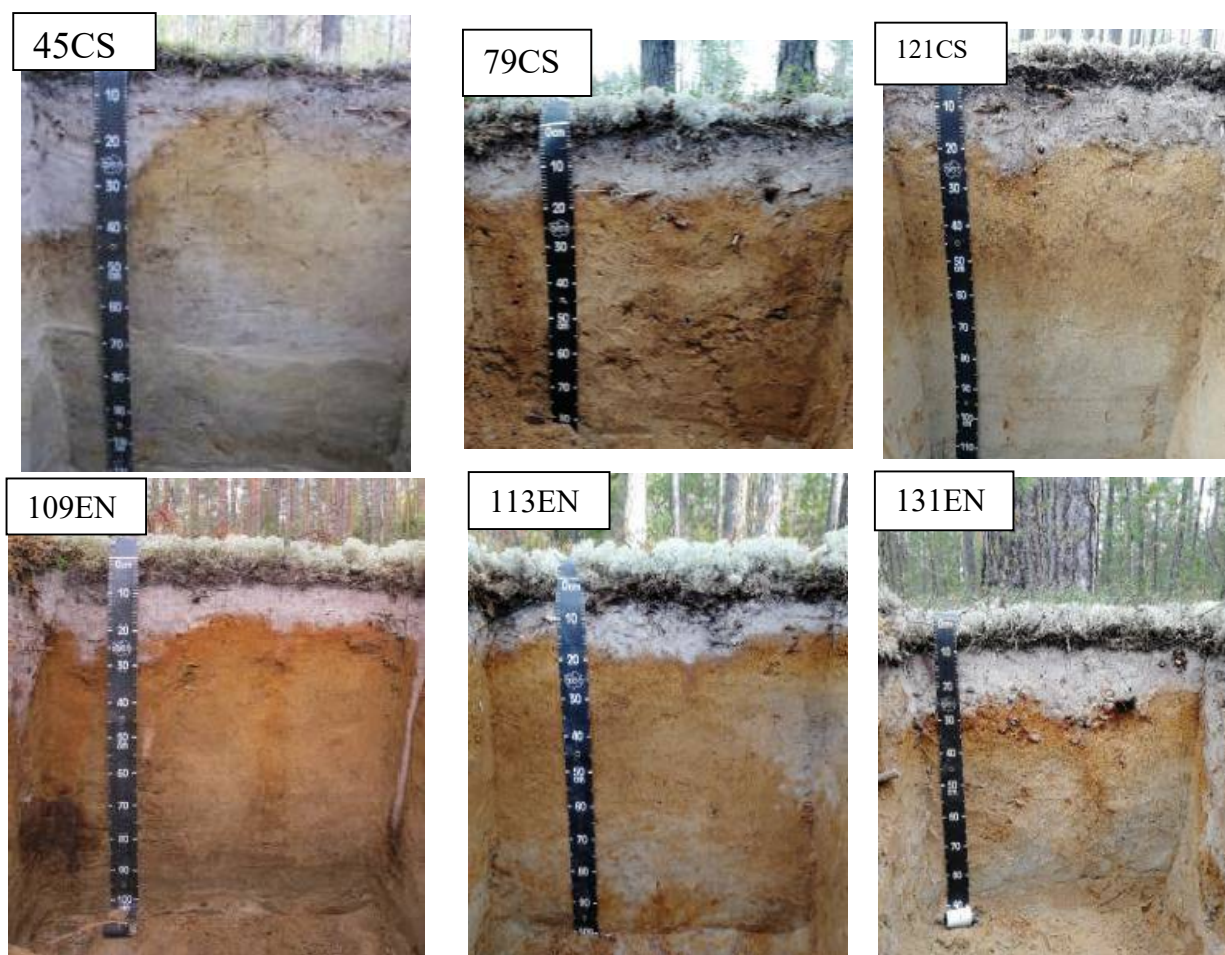

**Figure S1.** Profile photos of the investigated podzols.

**Table S1.** Texture of studied soils.

| Site                                                                 | Horizon                  | Depth, cm | Sand        |           |           |           |           | silt      |                 | clay |
|----------------------------------------------------------------------|--------------------------|-----------|-------------|-----------|-----------|-----------|-----------|-----------|-----------------|------|
|                                                                      |                          |           | very coarse | coarse    | medium    | fine      | very fine | coarse    | medium and fine |      |
|                                                                      |                          |           | 2.00-1.00   | 1.00-0.50 | 0.50-0.25 | 0.25-0.10 | 0.10-0.05 | 0.05-0.02 | 0.02-0.002      |      |
| Central Siberia (CS), Zotino (Krasnoyarsk region)                    |                          |           |             |           |           |           |           |           |                 |      |
| 45CS                                                                 | Epyr                     | 5-11      | 1           | 13        | 46        | 34        | 1         | 0         | 2               | 2    |
|                                                                      | E                        | 11-20     | 1           | 9         | 48        | 38        | 1         | 1         | 1               | 2    |
|                                                                      | Bs                       | 20-45(50) | 1           | 9         | 39        | 37        | 2         | 3         | 4               | 5    |
|                                                                      | B1                       | 45(50)-70 | 1           | 15        | 50        | 30        | 1         | 0         | 1               | 2    |
| 79CS                                                                 | Epyr                     | 2-6       | 1           | 8         | 37        | 51        | 2         | 0         | 0               | 1    |
|                                                                      | E                        | 6-16      | 0           | 9         | 37        | 49        | 2         | 0         | 1               | 2    |
|                                                                      | Bs                       | 16-35     | 0           | 7         | 30        | 49        | 2         | 2         | 4               | 6    |
|                                                                      | B1                       | 35-60     | 1           | 10        | 36        | 42        | 2         | 2         | 3               | 4    |
|                                                                      | B2                       | 60-90     | 1           | 8         | 33        | 47        | 1         | 2         | 3               | 5    |
| 121CS                                                                | Epyr                     | 4-10      | 0           | 6         | 45        | 44        | 2         | 0         | 1               | 2    |
|                                                                      | E                        | 10-20     | 0           | 6         | 44        | 45        | 2         | 0         | 2               | 2    |
|                                                                      | lower part of the tongue |           | 0           | 10        | 57        | 22        | 0         | 3         | 4               | 4    |
|                                                                      | Bs1                      | 20-40     | 0           | 4         | 33        | 48        | 2         | 3         | 4               | 5    |
|                                                                      | Bs2                      | 40-60     | 0           | 7         | 38        | 43        | 1         | 3         | 4               | 4    |
|                                                                      | B                        | 60-100    | 0           | 7         | 35        | 54        | 1         | 1         | 1               | 1    |
| European North (EN), Pechora-Ilychsky nature reserve (Komi Republic) |                          |           |             |           |           |           |           |           |                 |      |
| 109EN                                                                | Epyr                     | 4-7       | 0           | 1         | 19        | 72        | 1         | 2         | 1               | 3    |
|                                                                      | E                        | 7-16      | 0           | 1         | 21        | 73        | 1         | 0         | 1               | 2    |
|                                                                      | Bs1                      | 6-40      | 0           | 1         | 22        | 63        | 1         | 3         | 4               | 6    |
|                                                                      | B1                       | 40-60     | 0           | 1         | 27        | 63        | 1         | 2         | 3               | 4    |
|                                                                      | Black layer              | 60-80     | 0           | 1         | 31        | 57        | 1         | 3         | 3               | 4    |
|                                                                      | B2                       | 80-100    | 0           | 7         | 58        | 30        | 0         | 1         | 1               | 2    |
| 113EN                                                                | Epyr                     | 4-7       | 0           | 2         | 30        | 57        | 3         | 0         | 2               | 6    |
|                                                                      | E                        | 7-18      | 0           | 2         | 30        | 56        | 3         | 0         | 2               | 7    |
|                                                                      | Bs1                      | 18-25     | 0           | 1         | 28        | 44        | 2         | 4         | 8               | 12   |
|                                                                      | Bs2                      | 25-60     | 0           | 1         | 24        | 49        | 3         | 4         | 8               | 12   |
|                                                                      | B                        | 60-100    | 0           | 1         | 17        | 59        | 7         | 2         | 4               | 11   |
| 131EN                                                                | Epyr                     | 3-7       | 1           | 4         | 31        | 49        | 6         | 1         | 2               | 6    |
|                                                                      | E                        | 7-20      | 0           | 4         | 25        | 55        | 6         | 0         | 2               | 7    |
|                                                                      | Bs                       | 20-35     | 1           | 3         | 22        | 52        | 5         | 3         | 6               | 9    |
|                                                                      | B1                       | 35-60     | 1           | 3         | 27        | 57        | 3         | 2         | 2               | 4    |
|                                                                      | B2                       | 60-100    | 0           | 2         | 18        | 23        | 10        | 6         | 14              | 27   |
